# Supplementary material for: CKAP4 is a potential exosomal biomarker and therapeutic target for lung cancer
Source: PubMed Central journal article supplement — Transl Lung Cancer Res. 2023 Mar 17;12(3):408–26. doi: 10.21037/tlcr-22-571 (PMC10087988; doi:10.21037/tlcr-22-571), 2023-03-17
Supplement: tlcr-12-03-408-dss.pdf [file tlcr-12-03-408-dss.pdf]

## Data Sharing Statement

|                     |                                                                                                                                                    |                                                                                                                  |
|---------------------|----------------------------------------------------------------------------------------------------------------------------------------------------|------------------------------------------------------------------------------------------------------------------|
| <b>Article Info</b> | <a href="https://dx.doi.org/10.21037/tlcr-22-571">https://dx.doi.org/10.21037/tlcr-22-571</a>                                                      |                                                                                                                  |
| <b>Item</b>         | <b>Question</b>                                                                                                                                    | <b>Authors' Response<br/>(place "-" if not applicable)</b>                                                       |
| 1                   | Would you like to share data collected for your study to others?                                                                                   | It can be shared with the permission of the researchers.                                                         |
| 2                   | If not, would you like to share the reason for your decision?                                                                                      | -                                                                                                                |
| 3                   | What data in particular will be shared?                                                                                                            | All raw data.                                                                                                    |
| 4                   | Any other documents will be share? Such as study protocol, statistical analysis plan, informed consent form, clinical study report, analytic code. | Study protocol, informed consent form.                                                                           |
| 5                   | When will data availability begin?                                                                                                                 | From the publication date.                                                                                       |
| 6                   | When will data availability end?                                                                                                                   | Two years within the publication date.                                                                           |
| 7                   | To whom will you share the data?                                                                                                                   | Oncologists interested in this study.                                                                            |
| 8                   | For what type of analysis or purpose?                                                                                                              | To evaluate the efficacy of anti-CKAP4 antibodies in cancer patients.                                            |
| 9                   | How or where can the data/documents be obtained?                                                                                                   | Email could be sent to the address below to obtain the shared data: akikuchi@cider.osaka-u.ac.jp                 |
| 10                  | Any other restrictions?                                                                                                                            | We may balance the potential benefits and risks for each request and then provide the data that could be shared. |
