# Supplementary material for: CKAP4 is a potential exosomal biomarker and therapeutic target for lung cancer
Source: PubMed Central journal article supplement — Transl Lung Cancer Res. 2023 Mar 17;12(3):408–26. doi: 10.21037/tlcr-22-571 (PMC10087988; doi:10.21037/tlcr-22-571), 2023-03-17
Supplement: tlcr-12-03-408-supplementary.pdf [file tlcr-12-03-408-supplementary.pdf]

## Supplementary

**Table S1** List of cell lines used in this study

| Cell line | Species                          | Source              | Time           | Culture medium (with 10% FBS) |
|-----------|----------------------------------|---------------------|----------------|-------------------------------|
| A549      | Human LUAD                       | Purchased from ATCC | September 2010 | DMEM                          |
| Calu-1    | Human epidermoid carcinoma       | Purchased from ATCC | December 2015  | RPMI                          |
| NCI-H292  | Human mucoepidermoid carcinoma   | Purchased from ATCC | February 2019  | RPMI                          |
| HCC4006   | Human LUAD                       | Purchased from ATCC | July 2019      | RPMI                          |
| NCI-1573  | Human LUAD                       | Purchased from ATCC | March 2019     | RPMI                          |
| NCI-H1650 | Human LUAD                       | Purchased from ATCC | January 2019   | RPMI                          |
| NCI-H1975 | Human LUAD                       | Purchased from ATCC | January 2014   | RPMI                          |
| NCI-H3255 | Human LUAD                       | Purchased from ATCC | November 2013  | RPMI                          |
| NCI-H358  | Human bronchioalveolar carcinoma | Purchased from ATCC | September 2010 | RPMI                          |
| NCI-H441  | Human LUAD                       | Purchased from ATCC | September 2010 | RPMI                          |
| HCC827    | Human LUAD                       | Purchased from ATCC | November 2013  | RPMI                          |

FBS, fetal bovine serum; LUAD, lung adenocarcinoma; ATCC, American Type Culture Collection; DMEM, Dulbecco's modified Eagle's medium; RPMI, Roswell Park Memorial Institute.

**Table S2** List of antibodies used in this study

| Antigen     | Company                   | Catalog #   | Purpose | Dilution ratio |
|-------------|---------------------------|-------------|---------|----------------|
| Clathrin    | BD Biosciences            | 610500      | WB      | 1:1,000        |
| HSP90       | BD Biosciences            | 610418      | WB      | 1:1,000        |
| DKK1        | Cell Signaling Technology | 48367S      | WB      | 1:200          |
| DKK1        | R&D Systems               | MAB10962    | IHC     | 1:200          |
| AKT         | Cell Signaling Technology | 9272        | WB      | 1:1,000        |
| pAKT (S473) | Cell Signaling Technology | 9271        | WB      | 1:1,000        |
| CD81        | Cosmobio                  | SHI-EXO-M03 | WB      | 1:1,000        |
| TSG101      | Sigma-Aldrich             | HPA006161   | WB      | 1:1,000        |
| HSP90       | BD Biosciences            | 610418      | WB      | 1:2,000        |
| pEGFR       | Cell Signaling Technology | 3777        | WB      | 1:1,000        |
| EGFR        | BD Biosciences            | 610016      | WB      | 1:1,000        |
| LAMP1       | Santa Cruz Biotechnology  | Sc-20011    | WB      | 1:1,000        |
| Rab5        | BD Biosciences            | 610724      | WB      | 1:1,000        |
| Rab7        | Cell Signaling Technology | 9367        | WB      | 1:1,000        |
| LDLR        | Abcam                     | Ab52818     | WB      | 1:1,000        |

WB, western blotting; IHC, immunohistochemistry.

**Table S3** List of chemicals used in this study

| Product                          | Company                                 | Catalog #     |
|----------------------------------|-----------------------------------------|---------------|
| DexoMAG                          | Liquids Research                        |               |
| MagCapture Exosome isolation kit | Fujifilm Wako Pure Chemical Corporation | 293-77601     |
| Osimertinib                      | Selleck Chemicals                       | AZD9291       |
| Bafilomycin A1                   | AdipoGen Life Sciences                  | BVT-0252-C100 |

**Table S4** Target sequences for shRNA and siRNA used in this study

| Gene                      | Sequence              |
|---------------------------|-----------------------|
| Human DKK1 #1 (shRNA)     | GGATCTCTTGAATGACAA    |
| Human DKK1 #2 (shRNA)     | CGGTTCTCAATTCCAACGCTA |
| Human DKK1 #1 (siRNA)     | GCTCTCATGGACTAGAAAT   |
| Human DKK1 #2 (siRNA)     | CCTGGAGTGTAAGAGCTTT   |
| Human DKK3 #1 (shRNA)     | GGGTAGATGTGCAATAGAA   |
| Human DKK3 #2 (shRNA)     | GCATGAGGTGTTGTGCATT   |
| Human Clathrin #1 (siRNA) | CCTGCGGTCTGGAGTCAAC   |
| Human Clathrin #2 (siRNA) | CATTGGCTTCAGTACCCTG   |
| Human ALIX #1 (siRNA)     | GCTGAGTACCATCAGTCTA   |
| Human ALIX #2 (siRNA)     | GTACCTCAGTCTATATTGA   |
| Human Rab27a #1 (siRNA)   | GCTGCCAATGGGACAAACA   |
| Human Rab27a #2 (siRNA)   | CCTGAGAGTTAGGAGAAAT   |
| Human Rab27b #1 (siRNA)   | GCTGCCAATGGGACAAACA   |
| Human Rab27b #12 (siRNA)  | GCTGCCAATGGGACAAACA   |
| Human VPS26a #1 (siRNA)   | GCTAGAACACCAAGGAATT   |
| Human VPS26a #2 (siRNA)   | GGAAACAGAGAACAACTT    |
| Human VPS35 #1 (siRNA)    | CCTTTGGTATTTGCAGCTT   |
| Human VPS35 #2 (siRNA)    | CCATCCATTAAGAACCCAT   |
| Human CD63 #1 (siRNA)     | GCCTGCAAGGAGAACTATT   |
| Control (shRNA)           | GTGCGTTGCTAGTACCAAC   |
| Control (siRNA)           | CAGTCGCGTTTGCGACTGG   |

**Table S5** Primer sequences for quantitative PCR used in this study

| Gene                | Forward              | Reverse                |
|---------------------|----------------------|------------------------|
| Human <i>ALIX</i>   | TGGCTGCAAAGCACTGTATC | AGGGCACGATTGATTTTGTGTC |
| Human <i>Rab27A</i> | TGGGAGACTCTGGTGTAGGG | CCCTGCTGTGTCCCATAACT   |
| Human <i>Rab27B</i> | CACAAGGACCGAATGGATCT | GCAGTTGGCTCATCCAGTTT   |
| Human <i>VPS26A</i> | ATGACGGAGAATCCGTTTCA | TGGCACCGATGTAAGATTCA   |
| Human <i>VPS35</i>  | CGTGAAGATGGACCTGGAAT | TCCACACGATCAGGGTAACA   |
| Human <i>CD63</i>   | TGGGTGTCTTCTCTTCTG   | TCGGGTAATTCTCCATCTGC   |

PCR, polymerase chain reaction.

**Table S6** EGFR mutation status of the lung cancer cell lines used in this study

| Cell line | Histology      | EGFR mutation type | Other mutations |
|-----------|----------------|--------------------|-----------------|
| NCI-H1650 | Adenocarcinoma | E746-A750del       |                 |
| NCI-H1975 | Adenocarcinoma | L858R              | T790M           |
| NCI-H3255 | Adenocarcinoma | L858R              |                 |
| HCC827    | Adenocarcinoma | E746-A750del       |                 |
| HCC4006   | Adenocarcinoma | L747-E749del       |                 |

EGFR, epidermal growth factor receptor.

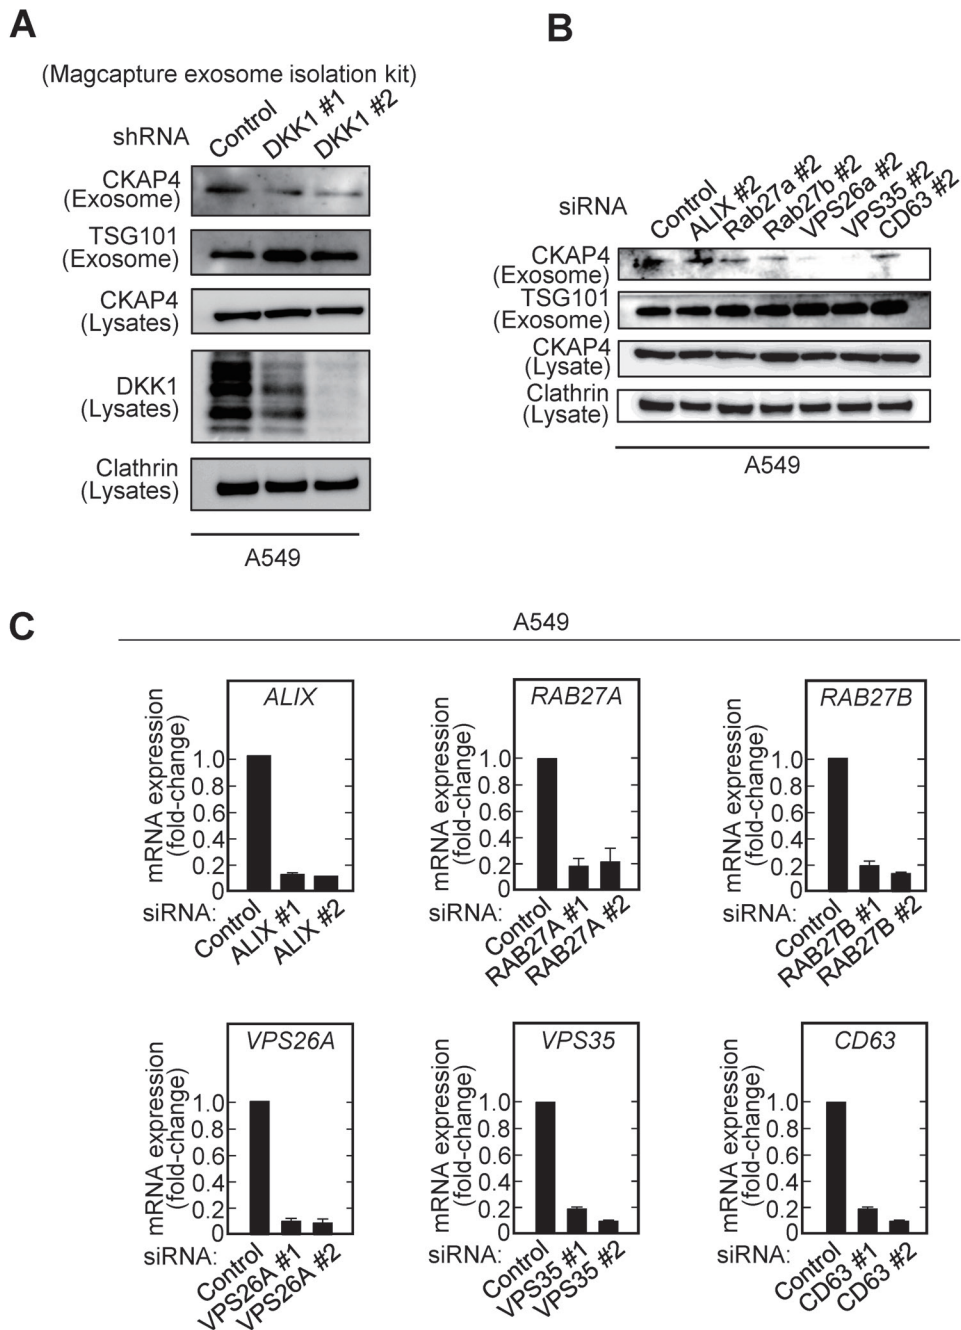

**Figure S1** CKAP4 is secreted with SEVs in a DKK1-dependent manner. (A) SEVs were prepared from CM of A549 cells transfected with control (scramble) or the indicated shRNAs using MagCapture. SEVs and lysates were probed with the indicated antibodies. (B,C) SEVs were prepared from CM of A549 cells transfected with control (scramble) or indicated siRNAs. The mRNA levels of indicated genes were assayed by quantitative RT-PCR, and relative mRNA levels were normalized to *GAPDH*. Results are shown as fold-change compared to control cells and expressed as the mean  $\pm$  SD from three independent experiments. SEVs, small extracellular vesicles; CM, conditioned medium; RT-PCR, real-time polymerase chain reaction; SD, standard deviation.

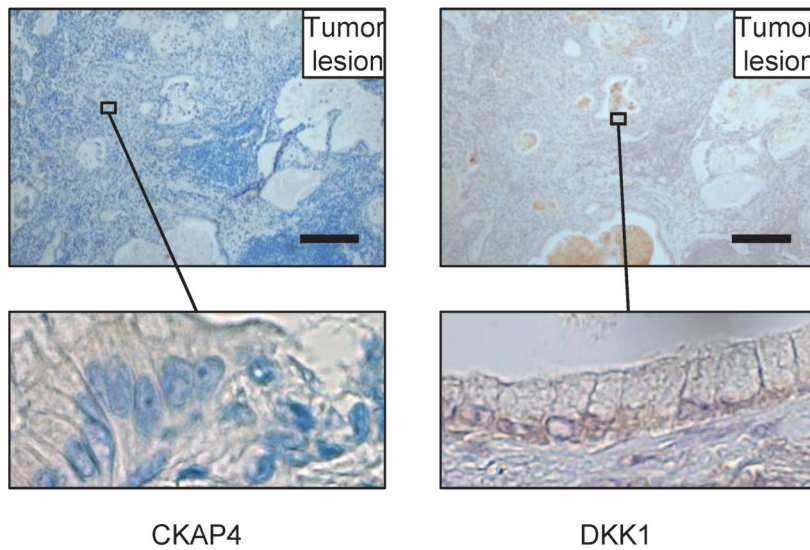

**Figure S2** Neither DKK1 nor CKAP4 was stained immunohistochemically in some non-small lung cancer cases. Representative images of IHC staining negative for DKK1 or CKAP4. Tumor tissues were stained with indicated antibodies and hematoxylin. Scale bar: 200  $\mu$ m. IHC, immunohistochemistry.

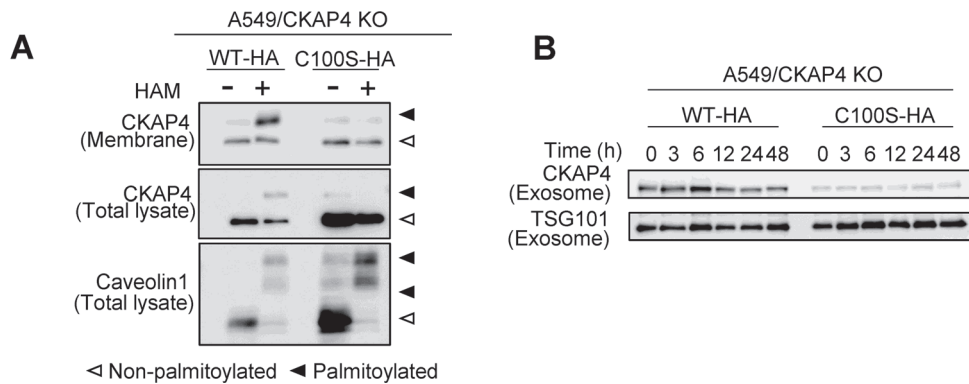

**Figure S3** CKAP4 is secreted with exosomes in a palmitoylation-dependent manner. (A) A549/CKAP4 KO/CKAP4-HA (WT-HA) and A549/CKAP4 KO/CKAP4 C100S-HA (C100S-HA) cells were biotinylated and subjected to APEGS assay. Reactions performed without hydroxylamine [lanes of HAM (-)] were negative controls. Total lysates and biotinylated precipitates (Membrane) were immunoblotted for CKAP4. (B) The CMs from A549/WT-HA or A549/C100S-HA cells were collected and incubated at RT for indicated times, after which SEVs were prepared and probed with indicated antibodies. KO, knockout; WT-HA, wild-type CKAP4 with HA tag; C100S-HA, CKAP4<sup>C100S</sup> mutant with HA tag; HAM, hydroxylamine; CM, conditioned medium; RT, room temperature; SEVs, small extracellular vesicles.
